1 **A target-specific assay for rapid and quantitative detection of *Mycobacterium chimaera* DNA in**  
2 **environmental and clinical specimens**

3

4 Enrique Zozaya-Valdés <sup>a</sup>, Jessica L. Porter <sup>a</sup>, John Coventry <sup>b</sup>, Janet A. M. Fyfe <sup>c</sup>, Glen P. Carter <sup>a</sup>,  
5 Anders Gonçalves da Silva <sup>b</sup>, Torsten Seemann <sup>d</sup>, Paul D. R. Johnson <sup>e</sup>, Andrew James Stewardson <sup>e</sup>,  
6 Ivan Bastian <sup>f</sup>, Sally A. Roberts <sup>g</sup>, Benjamin P. Howden <sup>b</sup>, Deborah A. Williamson <sup>b</sup>, Timothy P.  
7 Stinear <sup>a,#</sup>

8

9 Department of Microbiology and Immunology, The Doherty Institute for Infection and Immunity,  
10 University of Melbourne, Victoria, Australia<sup>a</sup>; Microbiological Diagnostic Unit Public Health  
11 Laboratory, Department of Microbiology and Immunology, The Doherty Institute for Infection and  
12 Immunity, University of Melbourne, Victoria, Australia <sup>b</sup>; Victorian Infectious Diseases Laboratory,  
13 The Doherty Institute for Infection and Immunity, Victoria, Australia <sup>c</sup>; Victorian Life Sciences  
14 Computational Initiative, University of Melbourne, Victoria, Australia <sup>d</sup>; Austin Health<sup>e</sup>; SA Pathology,  
15 South Australia, Australia <sup>f</sup>; Mycobacterial Laboratory, LabPlus, Auckland, New Zealand <sup>g</sup>

16

17 Running Head: Molecular detection of *M. chimaera*

18

19 #Address correspondence to Timothy P. Stinear, [tstinear@unimelb.edu.au](mailto:tstinear@unimelb.edu.au).

20

21

22       **Abstract.** *Mycobacterium chimaera* is an opportunistic environmental mycobacterium, belonging  
23       to the *Mycobacterium intracellulare* complex. Although most commonly associated with  
24       pulmonary disease, there has been growing awareness of invasive *M. chimaera* infections following  
25       cardiac surgery. Investigations suggest world-wide spread of a specific *M. chimaera* clone,  
26       associated with contaminated hospital heater-cooler units used during the surgery. Given the global  
27       dissemination of this clone, its potential to cause invasive disease, and the laboriousness of current  
28       culture-based diagnostic methods, there is a pressing need to develop rapid and accurate diagnostic  
29       assays, specific for *M. chimaera*. Here, we assessed 354 mycobacterial genome sequences and  
30       confirmed that *M. chimaera* is a phylogenetically coherent group. *In silico* comparisons indicated  
31       six DNA regions present only in *M. chimaera*. We targeted one of these regions and developed a  
32       TaqMan qPCR assay for *M. chimaera* with a detection limit of 10 CFU in whole blood. *In vitro*  
33       screening against DNA extracted from 40 other mycobacteria and 22 bacterial species from 21  
34       diverse genera confirmed *in silico* predicted specificity for *M. chimaera*. Screening 33 water  
35       samples from heater cooler units with this assay highlighted the increased sensitivity of PCR  
36       compared to culture, with 15 of 23 culture negative samples positive by *M. chimaera* qPCR. We  
37       have thus developed a robust molecular assay that can be readily and rapidly deployed to screen  
38       clinical and environmental specimens for *M. chimaera*.

39

40 **Introduction.**

41 *Mycobacterium chimaera* is an environmental mycobacterium and infrequent pathogen, most  
42 commonly linked with pulmonary disease (1-8). Interest in *M. chimaera* has heightened with global  
43 reports of invasive infections (including endocarditis and vascular graft infections associated with  
44 the use of LivaNova PLC (formerly Sorin Group Deutschland GmbH) Stöckert 3T heater-cooler  
45 units during cardiac surgery. The most plausible hypothesis for this widespread contamination is a  
46 point-source outbreak, although the underlying causative factors are not currently known (9-16).  
47 Phylogenetic comparisons of 16S–23S rRNA internal transcribed spacer (ITS) sequences, and/or  
48 partial *rpoB* or *hsp65* sequences (2, 5-7, 17, 18) suggest *M. chimaera* as a distinct entity within the  
49 *M. intracellulare* complex (6) and two recent population genomic analyses have confirmed this  
50 relationship (8, 13). The complete 6,593,403 bp genome sequence of *M. chimaera* ANZ045  
51 revealed a single circular 6,078,672 bp chromosome and five circular plasmids ranging in size from  
52 21,123 bp to 324,321 (8). *M. chimaera* is slow-growing, therefore current culture-based laboratory  
53 methods, followed by Sanger sequencing of amplicons for one or more combinations of conserved  
54 sequence regions, or line-probe hybridization assays are not amenable to timely and specific  
55 detection of this pathogen. This delay carries significant clinical, health provision, and medico-  
56 legal implications as patients may be exposed to contaminated machines during this turn-around  
57 time of up to 6-8 weeks. A rapid and reliable diagnostic tool is urgently needed to support clinical  
58 management of patients and to establish the efficacy of heater-cooler unit decontamination  
59 procedures. Here we addressed this issue by using comparative genomics to identify DNA  
60 sequences present in *M. chimaera* and absent from other mycobacteria. We describe the initial  
61 development and validation of a sensitive, specific and quantitative PCR assay for identification of  
62 *M. chimaera* in both clinical and environmental samples.

63

64

65 **Materials and methods.**

66 ***Bacterial strains and genome sequences.*** *Mycobacterium chimaera* strain DMG1600125 (a 2016  
67 HCU isolate from New Zealand) was used for spiking experiments (8). The mycobacterial genome  
68 sequences used in this study are listed in Table S1. *M. chimaera* was grown on Brown and Buckle  
69 whole-egg media, Middlebrook 7H9 broth or Middlebrook 7H10 agar (Becton Dickinson)  
70 supplemented with 10% (v/v) oleic acid albumin dextrose complex (OADC; Difco) or Middlebrook  
71 7H10 agar. Cultures were incubated without shaking at 37°C. *M. chimaera* colony counts were  
72 obtained by spotting 3 µL microliter volumes of six, 10-fold serial dilutions of a *M. chimaera*  
73 culture suspensions in quintuplicate on two Middlebrook 7H10 agar plates. The colonies were  
74 counted after incubation for four weeks at 37°C.

75  
76 ***Genomic DNA extraction methods, M. chimaera culture and environmental isolation.*** Purified  
77 *M. chimaera* genomic DNA for TaqMan assay validation was extracted from 50 mg wet weight cell  
78 pellets as described (19) and measured by fluorimetry using the Qubit and the *High Sensitivity*  
79 DNA kit (Thermofisher). For spiking experiments in blood, *M. chimaera* DNA was extracted from  
80 100 µL volumes of whole blood, using the Qiagen Blood & Tissue DNA extraction kit. Purified  
81 DNA was eluted from the columns in a 200 µL volume of 10 mM Tris (pH 8.0) (Qiagen). Total  
82 bacteria were concentrated from 30-1000 mL volumes of water collected from heater-cooler units  
83 by filtration through 47 mm, 0.22 µm mixed cellulose ester Millipore membranes. Immediately  
84 after filtration, membranes were aseptically placed in sterile 50 ml plastic tubes and stored at -70°C.  
85 DNA was extracted from membrane concentrate using the MoBio PowerWater DNA isolation kit  
86 following the manufacturer's instructions (MoBio) with an additional physical disruption step  
87 consisting of 2 x 20 sec at 5000 rpm in a Precellys 24 tissue homogenizer. To prevent cross  
88 contamination, a sterilized filtration device was used for each sample and sterile, distilled water  
89 extraction blanks were filtered and processed (100 mL volumes) at a frequency of one for every 10

90 test samples. Culture isolation of *M. chimaera* from 50 mL volumes of water samples was  
91 undertaken as described (20).

92  
93 ***Population structure and phylogenetic analysis.*** Snippy v3.1 (<https://github.com/tseemann/snippy>)  
94 was used to align Illumina sequence read data or *de novo* assembled contigs from *M. chimaera* and  
95 related mycobacterial genomes against the fully-assembled, complete MC\_ANZ045 reference  
96 genome to call core genome single nucleotide polymorphism (SNP) differences and generate  
97 pairwise sequence alignments. Hierarchical Bayesian clustering (hierBAPS) was performed using  
98 these core whole-genome SNP alignments as input to assess population structure (a prior of 6 depth  
99 levels and a maximum of 20 clusters was specified) (21), with phylogenies inferred using FastTree  
100 v2.1.8 under a GTR model of nucleotide substitution (22). Pairwise SNP analysis between groups  
101 of genomes was performed using a custom R script (<https://github.com/MDU->  
102 [PHL/pairwise\\_snp\\_differences](https://github.com/MDU-PHL/pairwise_snp_differences)). Recombination detection was performed using ClonalFrameML  
103 v1.7 (23).

104  
105 ***In silico subtractive hybridization and target identification.*** To identify regions of DNA present in  
106 *M. chimaera* but absent from other mycobacteria, the Illumina sequence reads of 46 *M. chimaera*  
107 isolates from Australia and New Zealand and eight publicly available *M. intracellulare* genomes  
108 (Table S1) were aligned using BWA MEM v0.7.15-r1140 (<https://arxiv.org/abs/1303.3997>) to a  
109 complete *M. chimaera* reference genome (MC\_ANZ045) (8). The read depth at each position was  
110 examined to identify those positions in the reference genome that were present across all  
111 *M. chimaera* isolates but absent from all *M. intracellulare* genomes. These genomic regions were  
112 extracted from MC\_ANZ045 and compared against the NCBI Genbank non-redundant (*nt*)  
113 nucleotide database using NCBI BLAST v2.5.0 (CITE?) with parameters *-remote -max\_target\_seqs*  
114 *100 -task blastn -outfmt "6 std qcovs staxid ssciname"*. Resulting BLAST hits that were missing a

115 taxon name were retrieved from the NCBI taxonomy database using the taxon id. Ignoring BLAST  
116 hits against bonafide *M. chimaera* sequences, the query alignment positions for every hit were  
117 extracted and were used to obtain all the sequence segments that had no hits against the Genbank *nt*  
118 database and that were greater than 500 bp in length. For this, *bedtools complement* and *getfasta*  
119 tools were used (24). The sequence segments thus obtained were considered candidate *M.*  
120 *chimaera*-specific genomic regions. The presence of these regions across a wider collection of *M.*  
121 *chimaera* was assessed by downloading all *M. chimaera* genome sequence reads present in the  
122 NCBI sequence read archive SRA as of October 2016 (Table S1) and processing through the  
123 Nullarbor pipeline v1.2 (<https://github.com/tseemann/nullarbor>). The output information was used  
124 to filter out poor quality or non-*M. chimaera* reads sets based on G+C content significantly below  
125 66%, an average read depth below 30, a total contig length above 8Mb, predicted rRNA genes  
126 greater than four, or a total of sequence aligned to the reference genome below 70% (Table S1).  
127 Using Snippy again, all *M. chimaera* genomes identified above were mapped to a version of the  
128 MC\_ANZ045 reference genome in which the non-*M. chimaera*-specific sequence regions had been  
129 hard masked. The resulting multiple sequence alignment was parsed using a custom Perl script to  
130 identify those *M. chimaera*-specific regions that were present in all *M. chimaera* genomes. These  
131 DNA sequences were inspected further for development of *M. chimaera* TaqMan PCR diagnostic  
132 assays. TaqMan primers and probes (Sigma Oligonucleotides) were designed using Primer3 (25)  
133 and Primer-BLAST against NCBI *nt* database was used to check that the primers and probes  
134 designed were specific to *M. chimaera*. TaqMan probe 1970-P were labeled with the fluorescent  
135 dye 6-carboxyfluorescein (FAM) at the 5' end and a nonfluorescent quencher at the 3' end (Sigma  
136 Oligonucleotides). To assess the context of these *M. chimaera*-specific regions, AlienHunter v1.4  
137 was used to screen the MC\_ANZ045 genome for DNA compositional bias, indicative of  
138 horizontally acquired DNA (26).

139

140 **TaqMan quantitative PCR.** TaqMan PCR mixtures contained 2 µl of template DNA, 0.4-µM  
141 concentrations of each primer, a 0.2 µM concentration of the probe, SensiFAST Probe Lo-ROX  
142 (1x) mix (Bioline), and TaqMan exogenous internal positive control (IPC) reagents (Applied  
143 Biosystems) in a total volume of 20 µl. Amplification and detection were performed with the  
144 Mx3005P (Stratagene) using the following program: 40 cycles of 95°C for 10 s and 60°C for 20 s.  
145 DNA extracts were tested in at least duplicate, and negative and positive template controls were  
146 included in each run. Standard curves were prepared using eight, 10-fold serial dilutions of  
147 *M. chimaera* genomic DNA at an initial concentration of 120 ng/µL, tested in triplicate. The  
148 percentage PCR amplification efficiency (E) for the TaqMan assay was calculated from the  
149 slope (C) of the standard curve  $E = (10^{(-1/C)}) * 100$ . Cycle threshold values for unknown samples  
150 were converted to genome equivalents by interpolation, with reference to the standard curve of Ct  
151 versus dilutions of known concentrations of *M. chimaera* genomic DNA. The mass in femtograms  
152 of a single *M. chimaera* genome was estimated as 6.59 fg, using the formula  $M = (N) * (1.096e-21)$ ,  
153 where M = mass of the single double-stranded *M. chimaera* NZ045 reference genome and  
154  $N = 6593403$ , which is the length of the *M. chimaera* NZ045 reference genome, and assuming the  
155 average MW of a double-stranded DNA molecule is 660 g/mol. Analyses were performed using  
156 Graphpad Prism v6.0h.

157

## 158 **Results**

159 **Assessment of *M. chimaera* population structure.** To identify DNA segments present only in  
160 *M. chimaera* genomes we first assessed the phylogenetic coherence of “*M. chimaera*” as a species.  
161 Using 96 mycobacterial genome sequences, comprising 63 *M. chimaera* genomes from North  
162 America, Australia, and New Zealand, and 33 other related, publicly available mycobacteria from  
163 the *Mycobacterium avium-intracellulare* complex, we conducted whole genome pairwise  
164 comparisons of the 96 taxa to the *M. chimaera* ANZ045 complete reference chromosome. The 63

165 *M. chimaera* genomes included 49 HCU-associated and 14 previously described patient isolates,  
166 not all of which were associated with Stöckert 3T HCU contamination (8, 12). These comparisons  
167 identified 448,878 variable nucleotide positions in a 2,340,885 bp core genome. A robust  
168 phylogeny inferred from the alignments strongly suggested that *M. chimaera* forms a monophyletic  
169 lineage within the *M. intracellulare* complex (Fig. 1A) (8, 13). Bayesian analysis of population  
170 structure (BAPS) using these same data confirmed this clustering (Fig. 1A). Interestingly, this  
171 assessment indicated that a publicly available isolate originally identified as *Mycobacterium*  
172 *intracellulare* (strain MIN\_052511\_1280) was in fact *M. chimaera*. The mean number of SNPs  
173 between any pair of the 63 *M. chimaera* isolates, and MIN\_052511\_1280 (BAPS-3), not adjusted  
174 for recombination, was 115 SNPs (range: 1 - 3,024 and IQR: 13 - 31), highlighting restricted core  
175 genome variation within this species, particularly given the large 6.5 Mb genome size. In  
176 comparison, the mean number of SNPs between 15 *M. intracellulare*-complex genomes (BAPS-2)  
177 was 24,134 SNPs (range: 13 - 39,109 and IQR: 14,780 - 33,138) (Fig. 1A). We then extended this  
178 analysis to assess an additional 257 publicly available *M. chimaera* and related mycobacterial  
179 genome sequences (Table S1). Pairwise whole genome comparisons of this larger data set were  
180 performed against the ANZ045 reference genome. Population structure analysis indicated 303  
181 mycobacterial genomes fell within BAPS-3 (Table S1). Pairwise comparisons were again  
182 performed against the ANZ045 using only these 303 genomes, with five other genome sequences  
183 from BAPS-2 included for context. The alignment was filtered to remove sites from the alignment  
184 affected by recombination and a phylogeny was inferred from the resulting 10,166 variable  
185 nucleotide positions (Fig. S1. Fig. 2). The mean number of SNPs between the 303 genomes was  
186 268 (range: 0 - 3,211 and IQR: 9 - 62). This analysis confirmed that *M. chimaera* does indeed form  
187 a monophyletic lineage, providing a robust genetic definition for the species. As previously  
188 reported, HCU-associated isolates from around the world formed a distinct sub-clade within this  
189 lineage (Fig. 2) (8, 13).



190

191 **In silico genome comparisons to identify *M. chimaera* specific sequences.** A subset of 46 genome  
192 *M. chimaera* genome sequences as defined above became the ‘training set’ to find DNA segments  
193 present only in *M. chimaera* (Fig. 2, Table S1). Mapping of DNA sequence reads to the ANZ045  
194 reference genome (refer methods) allowed the identification of 159 genomic segments >500 bp in  
195 length and covering 510,924 bp that were present across the 46 *M. chimaera* isolates and absent  
196 from eight *M. intracellulare* isolates (Fig. 1A). BLAST comparisons of the 159 segments against  
197 all entries in the NCBI Genbank *nt* database and removal of any non-*M. chimaera* specific  
198 sequence reduced the number to 37 segments (covering a total of 37,890 bps). A larger validation  
199 set comprising the 63 *M. chimaera* genomes described in Fig. 1A and 242 additional, publicly  
200 available *M. chimaera* genomes that satisfied our above phylogenomic inclusion criteria was then  
201 screened (Table S1). Six of the 37 *M. chimaera*-specific regions (SR), covering a total of 8,292 bp,  
202 were present in all 305 *M. chimaera* genomes (Fig. 1B). The six SRs ranged in length from 531 bp  
203 to 4,641 bp, the majority overlapping predicted chromosomal protein-coding sequences (Fig. 1B,  
204 Table 1). Inferred functions of these CDS are summarized (Table 1). The regions were scanned for  
205 sequence polymorphisms and one of these regions (SR1) that was 100% conserved among all *M.*  
206 *chimaera*, was selected as a template for the design of a TaqMan assay (Fig. 2, Table 2). SR1 spans  
207 two predicted CDS that DNA composition analysis and gene annotation predicted lay within a 35 -  
208 kb putative prophage or integrative mobile element. A 79 bp TaqMan amplicon (assay ID: 1970)  
209 was designed within a 2934 bp CDS (predicted function: unknown) (Table 2).

210

211 **TaqMan assay specificity testing.** The above *in silico* analyses predicted the TaqMan assay would  
212 be diagnostic for the presence of *M. chimaera*. To test this prediction, DNA was prepared from 42  
213 mycobacteria (including two *M. chimaera* isolates) and 22 other bacteria from 21 different genera.  
214 A pan-bacterial 16S rRNA PCR was first performed to ensure detectable bacterial DNA was

215 present. All 64 DNA samples were positive by 16S rRNA PCR (data not shown) but only the two  
216 *M. chimaera* isolates were 1970-P TaqMan assay positive, supporting the *in silico* predictions that  
217 these assays are specific for *M. chimaera* (Table S2).

218

219 ***TaqMan assay efficiency and sensitivity testing.*** To establish the limit of detection and  
220 amplification efficiency for the 1970-P TaqMan assay, 10-fold serial dilutions of purified  
221 *M. chimaera* ANZ045 genomic DNA were tested in triplicate. The 1970-P assay showed excellent  
222 performance characteristics, with a very good linear response across five orders of magnitude,  $R^2$   
223 values  $>0.99$ , amplification efficiencies of 94%, and a detection limit around 20 genome  
224 equivalents (Fig. 3A). The detection limit was also assessed using dilutions of *M. chimaera* culture  
225 spiked into whole blood. Again, the assay showed excellent performance characteristics in this  
226 simulated clinical condition, with an absolute detection limit around 10 CFU (equivalent to 100  
227 CFU/mL of blood). These experiments indicate 1970-P is a suitable qPCR assay for sensitive and  
228 quantitative detection of *M. chimaera* DNA.

229

230 ***Detection of M. chimaera DNA in environmental samples.*** A key requirement for this assay is the  
231 ability to screen water and biofilm samples from heater-cooler units for *M. chimaera*, to determine  
232 if maintenance procedures have removed the bacteria from contaminated units, or prevented  
233 contamination. Having assessed the sensitivity and specificity of the assay with laboratory-prepared  
234 samples, we next explored performance with environmental samples. We screened concentrates  
235 from 33 water samples obtained from heater-cooler units at seven hospitals and HCU distributors in  
236 our region, that had been assessed by culture for *M. chimaera*. A total of 25 of 33 samples were  
237 positive by 1970-P TaqMan PCR, with estimated *M. chimaera* concentrations ranging from 2-  
238 102,000 GE/mL of water (Table 3). Using the culture results as a ‘gold standard’, the negative  
239 predictive value for the TaqMan assays was high (100%) with all eight culture positive samples

240 also positive 1970-P TaqMan PCR (Table 4). However, there was poor correspondence between  
241 culture negative samples and qPCR. Fifteen samples negative by culture returned 1970-P TaqMan  
242 positive results, with Ct values for some of these samples less than 24, indicating high *M. chimaera*  
243 concentrations above 10,000 GE per milliliter of original sample (Table 3). Heterotrophic colony  
244 count (HCC) at 37°C is used as a general indicator of water cleanliness, and in some settings may  
245 be used as a surrogate indicator of decontamination effectiveness (27). However, we observed a  
246 poor correlation between HCC and the presence of *M. chimaera* as measured by qPCR (Spearman's  
247  $\rho=0.2813$ ,  $p=0.1128$ ) (Table 3), suggesting that HCC is not a suitable surrogate for the presence or  
248 absence of *M. chimaera*.

249

## 250 **Discussion**

251 Since 2012 there have been a small but increasing number of case reports of invasive infection with  
252 *M. chimaera* in individuals who have undergone surgical procedures requiring cardiac bypass (8,  
253 10-16). Almost all cases have involved placement of prosthetic valves or other prosthetic material  
254 and are linked to use of a specific type of heater cooler unit (HCU) in the bypass procedure (8, 13,  
255 14). As contamination of these HCUs may have occurred at or near the time of manufacture and  
256 the machines are widely exported, exposure to *M. chimaera* during cardiac bypass surgery is an  
257 emerging issue in infection control that is not restricted by region or country (8). However, while it  
258 appears that generation of aerosols when machines are contaminated may be relatively common, so  
259 far the likelihood of infection for any exposed individual is very low (13). From a clinical  
260 perspective, this poses a major diagnostic challenge. Post-cardiac surgery *M. chimaera* infection  
261 has a long incubation period, non-specific symptoms and can be misdiagnosed as a steroid-  
262 requiring inflammatory condition with potentially disastrous consequences (10, 15). Moreover,  
263 there is a significant case fatality rate even when correctly identified and current opinion is that  
264 early accurate diagnosis will be key to achieving the best treatment outcomes (28). Given the non-

265 specific symptoms and low prior probability of infection in a large exposed population, clinicians  
266 urgently need access to a specific and sensitive test for *M. chimaera* cardiac and extra-cardiac  
267 infection. Infection control practitioners have a different but equally challenging problem with  
268 respect to surveying and cleaning contaminated HCUs. In this report, we describe and validate a  
269 DNA target that is diagnostic for the presence of *M. chimaera*. We have shown under simulated  
270 conditions that it can accurately detect *M. chimaera* in human blood samples at very low  
271 concentrations and outperform culture in detecting *M. chimaera* in specimens obtained from  
272 contaminated HCUs.

273  
274 The European Centre for Disease Prevention and Control recommends *M. chimaera* identification  
275 is performed by sequencing at least two conserved fragments among 16S–23S rRNA ITS,  
276 16SrRNA, *rpoB* and *hsp65* [21,22]. Some laboratories have also used the MIN-2 probe in the  
277 INNO-LiPA Mycobacteria v2 line probe assay (6, 18). Here we simplify this suite of tests, with a  
278 *M. chimaera*-specific PCR assay, that has the advantages of providing a rapid yes/no result and an  
279 estimate of bacterial concentration. The test could be further enhanced with multiple DNA targets.  
280 The other five *M. chimaera*-specific regions reported here could be used to develop additional  
281 diagnostic targets (Fig. 1B). We envisage that this test will be used in conjunction with efforts to  
282 culture *M. chimaera* from specimens, as isolates are required for WGS to establish the genetic  
283 relatedness of isolates, and potentially for antimicrobial susceptibility testing (although  
284 antimicrobial resistance is not thought to be a major problem). As a previous risk assessment by  
285 Public Health England suggested a possible legionellosis risk for staff and patients, we propose that  
286 our assay should form part of a ‘HCU panel’ along with *Legionella* PCR (28, 29). While we have  
287 designed an assay to detect all *M. chimaera*, it may also be possible to detect specific *M. chimaera*  
288 lineages. For instance, it may be possible to use DNA deletion polymorphisms to discriminate

289 among intra-species lineages, as in the *Mycobacterium tuberculosis* complex (30). We are currently  
290 exploring this possibility.

291

292 The infection risk posed by the water reservoirs within HCUs and the need for regular maintenance  
293 has been long recognized (29). Heterotrophic colony counts (HCC) are being considered as  
294 surrogates to assess the microbiological quality of HCUs (27, 31). We (like others) found a poor  
295 correlation between the presence of *M. chimaera* and HCC in water samples from HCUs (27), with  
296 examples of *M. chimaera* concentrations of 60,000 GE/mL when HCC were below the limit of  
297 detection (Table 3). More evaluation of the 1970-P assay is required, but our data suggest HCC  
298 may have an unacceptably high false-negative rate, which significantly reduces its utility for  
299 measuring the effectiveness of HCU decontamination procedures.

300

301 Screening HCU water samples with our TaqMan assay indicated the widespread presence of *M.*  
302 *chimaera* and a poor correlation with culture. There are several potential explanations for these  
303 observations. Despite the extensive *in silico* assessments, it is possible that the qPCR assay lacks  
304 specificity for *M. chimaera*, or that the culture method lacks sensitivity, or perhaps DNA from *M.*  
305 *chimaera* is still present but source organisms are no longer viable. Given the extensive *in silico*  
306 validation undertaken here to ensure target specificity, and the high prior probability that these  
307 HCU water samples contained *M. chimaera*, the discrepancy between culture and qPCR might best  
308 explained by either lower sensitivity of the mycobacterial culture method or PCR detection of intact  
309 DNA from non-viable *M. chimaera*. The later explanation is perhaps the most likely given that  
310 some of these PCR positive-culture negative samples were obtained from HCUs subjected to  
311 extensive decontamination procedures involving extended heating above 70°C.

312

313 In summary, we have developed a new diagnostic tool for rapid, sensitive and specific detection of  
314 *M. chimaera* to help address the urgent need to screen patient and HCU samples.

315

316 **Acknowledgments.** We thank submitting health-care facilities and laboratories for providing water  
317 samples and mycobacterial isolates. We are grateful to Chris Coulter for provision of materials and  
318 critical review of the manuscript.

319

320 **Funding information.** This research received no specific grant from any funding agency in the  
321 public, commercial, or not-for-profit sectors. DAW, BPH and TPS are supported by National  
322 Health and Medical Research Council Fellowships GNT1123854, GNT1105905 and GNT1105525  
323 respectively.

324

## 325 **References**

- 326 1. **Alhanna J, Purucker M, Steppert C, Grigull-Daborn A, Schiffel G, Gruber H, Borgmann**  
327 **S.** 2012. *Mycobacterium chimaera* causes tuberculosis-like infection in a male patient with  
328 anorexia nervosa. *Int J Eat Disord* **45**:450-452.
- 329 2. **Bills ND, Hinrichs SH, Aden TA, Wickert RS, Iwen PC.** 2009. Molecular identification of  
330 *Mycobacterium chimaera* as a cause of infection in a patient with chronic obstructive  
331 pulmonary disease. *Diagn Microbiol Infect Dis* **63**:292-295.
- 332 3. **Cohen-Bacrie S, David M, Stremmler N, Dubus JC, Rolain JM, Drancourt M.** 2011.  
333 *Mycobacterium chimaera* pulmonary infection complicating cystic fibrosis: a case report. *J Med*  
334 *Case Rep* **5**:473.
- 335 4. **Mac Aogain M, Roycroft E, Raftery P, Mok S, Fitzgibbon M, Rogers TR.** 2015. Draft  
336 Genome Sequences of Three *Mycobacterium chimaera* Respiratory Isolates. *Genome Announc*  
337 **3**.
- 338 5. **Moon SM, Kim SY, Jhun BW, Lee H, Park HY, Jeon K, Huh HJ, Ki CS, Lee NY, Shin SJ,**  
339 **Koh WJ.** 2016. Clinical characteristics and treatment outcomes of pulmonary disease caused by  
340 *Mycobacterium chimaera*. *Diagn Microbiol Infect Dis* **86**:382-384.

- 341 6. **Tortoli E, Rindi L, Garcia MJ, Chiaradonna P, Dei R, Garzelli C, Kroppenstedt RM, Lari**  
342 **N, Mattei R, Mariottini A, Mazzarelli G, Murcia MI, Nanetti A, Piccoli P, Scarparo C.**  
343 2004. Proposal to elevate the genetic variant MAC-A, included in the *Mycobacterium avium*  
344 complex, to species rank as *Mycobacterium chimaera* sp. nov. *Int J Syst Evol Microbiol*  
345 **54:1277-1285.**
- 346 7. **Schweickert B, Goldenberg O, Richter E, Gobel UB, Petrich A, Buchholz P, Moter A.**  
347 2008. Occurrence and clinical relevance of *Mycobacterium chimaera* sp. nov., Germany. *Emerg*  
348 *Infect Dis* **14:1443-1446.**
- 349 8. **Williamson D, Howden B, Stinear T.** 2017. Spread of *Mycobacterium chimaera* from Units  
350 Used in Cardiac Surgery. *New Eng J Med* **In press.**
- 351 9. **Zweifel SA, Mihic-Probst D, Curcio CA, Barthelmes D, Thielken A, Keller PM, Hasse B,**  
352 **Boni C.** 2016. Clinical and Histopathologic Ocular Findings in Disseminated *Mycobacterium*  
353 *chimaera* Infection after Cardiothoracic Surgery. *Ophthalmology*  
354 doi:10.1016/j.ophtha.2016.09.032.
- 355 10. **Tan N, Sampath R, Abu Saleh OM, Tweet MS, Jevremovic D, Alniemi S, Wengenack NL,**  
356 **Sampathkumar P, Badley AD.** 2016. Disseminated *Mycobacterium chimaera* Infection After  
357 Cardiothoracic Surgery. *Open Forum Infect Dis* **3:ofw131.**
- 358 11. **Sommerstein R, Ruegg C, Kohler P, Bloemberg G, Kuster SP, Sax H.** 2016. Transmission  
359 of *Mycobacterium chimaera* from Heater-Cooler Units during Cardiac Surgery despite an  
360 Ultraclean Air Ventilation System. *Emerg Infect Dis* **22:1008-1013.**
- 361 12. **Perkins KM, Lawsin A, Hasan NA, Strong M, Halpin AL, Rodger RR, Moulton-Meissner**  
362 **H, Crist MB, Schwartz S, Marders J, Daley CL, Salfinger M, Perz JF.** 2016. Notes from the  
363 Field: *Mycobacterium chimaera* Contamination of Heater-Cooler Devices Used in Cardiac  
364 Surgery - United States. *MMWR Morb Mortal Wkly Rep* **65:1117-1118.**
- 365 13. **Chand M, Lamagni T, Kranzer K, Hedge J, Moore G, Parks S, Collins S, Del Ojo Elias C,**  
366 **Ahmed N, Brown T, Smith EG, Hoffman P, Kirwan P, Mason B, Smith-Palmer A, Veal P,**  
367 **Lalor MK, Bennett A, Walker J, Yeap A, Isidro Carrion Martin A, Dolan G, Bhatt S,**  
368 **Skingsley A, Charlett A, Pearce D, Russell K, Kendall S, Klein AA, Robins S, Schelenz S,**  
369 **Newsholme W, Thomas S, Collyns T, Davies E, McMenamain J, Doherty L, Peto TE,**  
370 **Crook D, Zambon M, Phin N.** 2016. Insidious risk of severe *Mycobacterium chimaera*  
371 infection in cardiac surgery patients. *Clin Infect Dis* doi:10.1093/cid/ciw754.

- 372 14. **Sax H, Bloemberg G, Hasse B, Sommerstein R, Kohler P, Achermann Y, Rossle M, Falk**  
373 **V, Kuster SP, Bottger EC, Weber R.** 2015. Prolonged Outbreak of *Mycobacterium chimaera*  
374 Infection After Open-Chest Heart Surgery. Clin Infect Dis **61**:67-75.
- 375 15. **Kohler P, Kuster SP, Bloemberg G, Schulthess B, Frank M, Tanner FC, Rossle M, Boni**  
376 **C, Falk V, Wilhelm MJ, Sommerstein R, Achermann Y, Ten Oever J, Debast SB,**  
377 **Wolfhagen MJ, Brandon Bravo Bruinsma GJ, Vos MC, Bogers A, Serr A, Beyersdorf F,**  
378 **Sax H, Bottger EC, Weber R, van Ingen J, Wagner D, Hasse B.** 2015. Healthcare-associated  
379 prosthetic heart valve, aortic vascular graft, and disseminated *Mycobacterium chimaera*  
380 infections subsequent to open heart surgery. Eur Heart J **36**:2745-2753.
- 381 16. **Achermann Y, Rossle M, Hoffmann M, Deggim V, Kuster S, Zimmermann DR,**  
382 **Bloemberg G, Hombach M, Hasse B.** 2013. Prosthetic valve endocarditis and bloodstream  
383 infection due to *Mycobacterium chimaera*. J Clin Microbiol **51**:1769-1773.
- 384 17. **van Ingen J, Hoefsloot W, Buijtsels PC, Tortoli E, Supply P, Dekhuijzen PN, Boeree MJ,**  
385 **van Soolingen D.** 2012. Characterization of a novel variant of *Mycobacterium chimaera*. J Med  
386 Microbiol **61**:1234-1239.
- 387 18. **Lebrun L, Weill FX, Lafendi L, Houriez F, Casanova F, Gutierrez MC, Ingrand D,**  
388 **Lagrange P, Vincent V, Herrmann JL.** 2005. Use of the INNO-LiPA-MYCOBACTERIA  
389 assay (version 2) for identification of Mycobacterium avium-Mycobacterium intracellulare-  
390 Mycobacterium scrofulaceum complex isolates. J Clin Microbiol **43**:2567-2574.
- 391 19. **Yip MJ, Porter JL, Fyfe JA, Lavender CJ, Portaels F, Rhodes M, Kator H, Colorni A,**  
392 **Jenkin GA, Stinear T.** 2007. Evolution of *Mycobacterium ulcerans* and other mycolactone-  
393 producing mycobacteria from a common Mycobacterium marinum progenitor. J Bacteriol  
394 **189**:2021-2029.
- 395 20. **PHE.** 2016. Protocol for Environmental Sampling, Processing and Culturing of Water and Air  
396 Samples for the Isolation of Slow-Growing Mycobacteria. Health Do, Public Health England,  
397 London, UK.  
398 [https://www.gov.uk/government/uploads/system/uploads/attachment\\_data/file/540325/Air\\_wate](https://www.gov.uk/government/uploads/system/uploads/attachment_data/file/540325/Air_water_environmental_sampling_SOP_V2.pdf)  
399 [r\\_environmental\\_sampling\\_SOP\\_V2.pdf](https://www.gov.uk/government/uploads/system/uploads/attachment_data/file/540325/Air_water_environmental_sampling_SOP_V2.pdf).
- 400 21. **Cheng L, Connor TR, Sirén J, Aanensen DM, Corander J.** 2013. Hierarchical and spatially  
401 explicit clustering of DNA sequences with BAPS software. Molecular biology and evolution  
402 **30**:1224-1228.
- 403 22. **Price MN, Dehal PS, Arkin AP.** 2009. FastTree: computing large minimum evolution trees  
404 with profiles instead of a distance matrix. Mol Biol Evol **26**:1641-1650.



- 405 23. **Didelot X, Wilson DJ.** 2015. ClonalFrameML: efficient inference of recombination in whole  
406 bacterial genomes. *PLoS Comput Biol* **11**:e1004041.
- 407 24. **Quinlan AR, Hall IM.** 2010. BEDTools: a flexible suite of utilities for comparing genomic  
408 features. *Bioinformatics* **26**:841-842.
- 409 25. **Untergasser A, Cutcutache I, Koressaar T, Ye J, Faircloth BC, Remm M, Rozen SG.** 2012.  
410 Primer3--new capabilities and interfaces. *Nucleic Acids Res* **40**:e115.
- 411 26. **Vernikos GS, Parkhill J.** 2006. Interpolated variable order motifs for identification of  
412 horizontally acquired DNA: revisiting the Salmonella pathogenicity islands. *Bioinformatics*  
413 **22**:2196-2203.
- 414 27. **PHLN.** 2017. Public Health Laboratory Network: guidance regarding *Mycobacterium chimaera*  
415 and heater-cooler units. Department of Health, Australian Government, Canberra, Australia.  
416 [http://www.health.gov.au/internet/main/publishing.nsf/Content/83DA1AD46068E894CA25808](http://www.health.gov.au/internet/main/publishing.nsf/Content/83DA1AD46068E894CA258082001C86F0/$File/PHLN-guidance-Mycobacterium-chimaera.pdf)  
417 [2001C86F0/\\$File/PHLN-guidance-Mycobacterium-chimaera.pdf](http://www.health.gov.au/internet/main/publishing.nsf/Content/83DA1AD46068E894CA258082001C86F0/$File/PHLN-guidance-Mycobacterium-chimaera.pdf).
- 418 28. **PHE.** 2015. Infections associated with heater cooler units used in cardiopulmonary bypass and  
419 ECMO: information for healthcare providers in England. Public Health England, London, UK.  
420 [https://www.gov.uk/government/publications/infections-associated-with-heater-cooler-units-](https://www.gov.uk/government/publications/infections-associated-with-heater-cooler-units-used-in-cardiopulmonary-bypass-and-ecmo)  
421 [used-in-cardiopulmonary-bypass-and-ecmo](https://www.gov.uk/government/publications/infections-associated-with-heater-cooler-units-used-in-cardiopulmonary-bypass-and-ecmo).
- 422 29. **Weitkemper HH, Spilker A, Knobl HJ, Korfer R.** 2002. The heater-cooler unit--a  
423 conceivable source of infection. *J Extra Corpor Technol* **34**:276-280.
- 424 30. **Brosch R, Gordon SV, Marmiesse M, Brodin P, Buchrieser C, Eiglmeier K, Garnier T,**  
425 **Gutierrez C, Hewinson G, Kremer K, Parsons LM, Pym AS, Samper S, van Soolingen D,**  
426 **Cole ST.** 2002. A new evolutionary scenario for the *Mycobacterium tuberculosis* complex. *Proc*  
427 *Natl Acad Sci U S A* **99**:3684-3689.
- 428 31. **Anon.** 2016. Nontuberculous Mycobacterium (NTM) Infections Associated with Heater-Cooler  
429 Devices (HCD) during Cardiothoracic Surgery. Administration USFaD, FDA, USA.  
430 <http://www.fda.gov/downloads/AdvisoryCommittees/CommitteesMeetingMaterials/MedicalDe>  
431 [vices/MedicalDevicesAdvisoryCommittee/CirculatorySystemDevicesPanel/UCM503716.pdf](http://www.fda.gov/downloads/AdvisoryCommittees/CommitteesMeetingMaterials/MedicalDe).
- 432 32. **Alikhan NF, Petty NK, Ben Zakour NL, Beatson SA.** 2011. BLAST Ring Image Generator  
433 (BRIG): simple prokaryote genome comparisons. *BMC Genomics* **12**:402.
- 434
- 435
- 436

437 **Figures:**

438 Fig. 1: Phylogenetic and population structure analysis of *M. chimaera*

439 Fig. 2: Focused phylogenetic analysis of 303 *M. chimaera* genomes

440 Fig. 3: Sensitivity testing of 1970-P TaqMan PCR for *M. chimaera*

441

442 **Tables:**

443 Table 1. Summary of *M. chimaera*-specific DNA segments identified by comparative genomics

444 Table 2. Sequences of the *M. chimaera*-specific TaqMan primers and probe

445 Table 3. Environmental sampling qPCR, culture and heterotrophic plate count summary

446 Table 4. Correspondence between *M. chimaera* culture and 1970-P qPCR in HCU samples

447

448 **Supplementary material**

449

450 **Tables:**

451 Table S1: Mycobacterial genome sequences used in this study

452 Table S2: Summary of TaqMan assay *in vitro* specificity screening

453

454

455 **Figures:**  
456  
457 **Fig. 1**

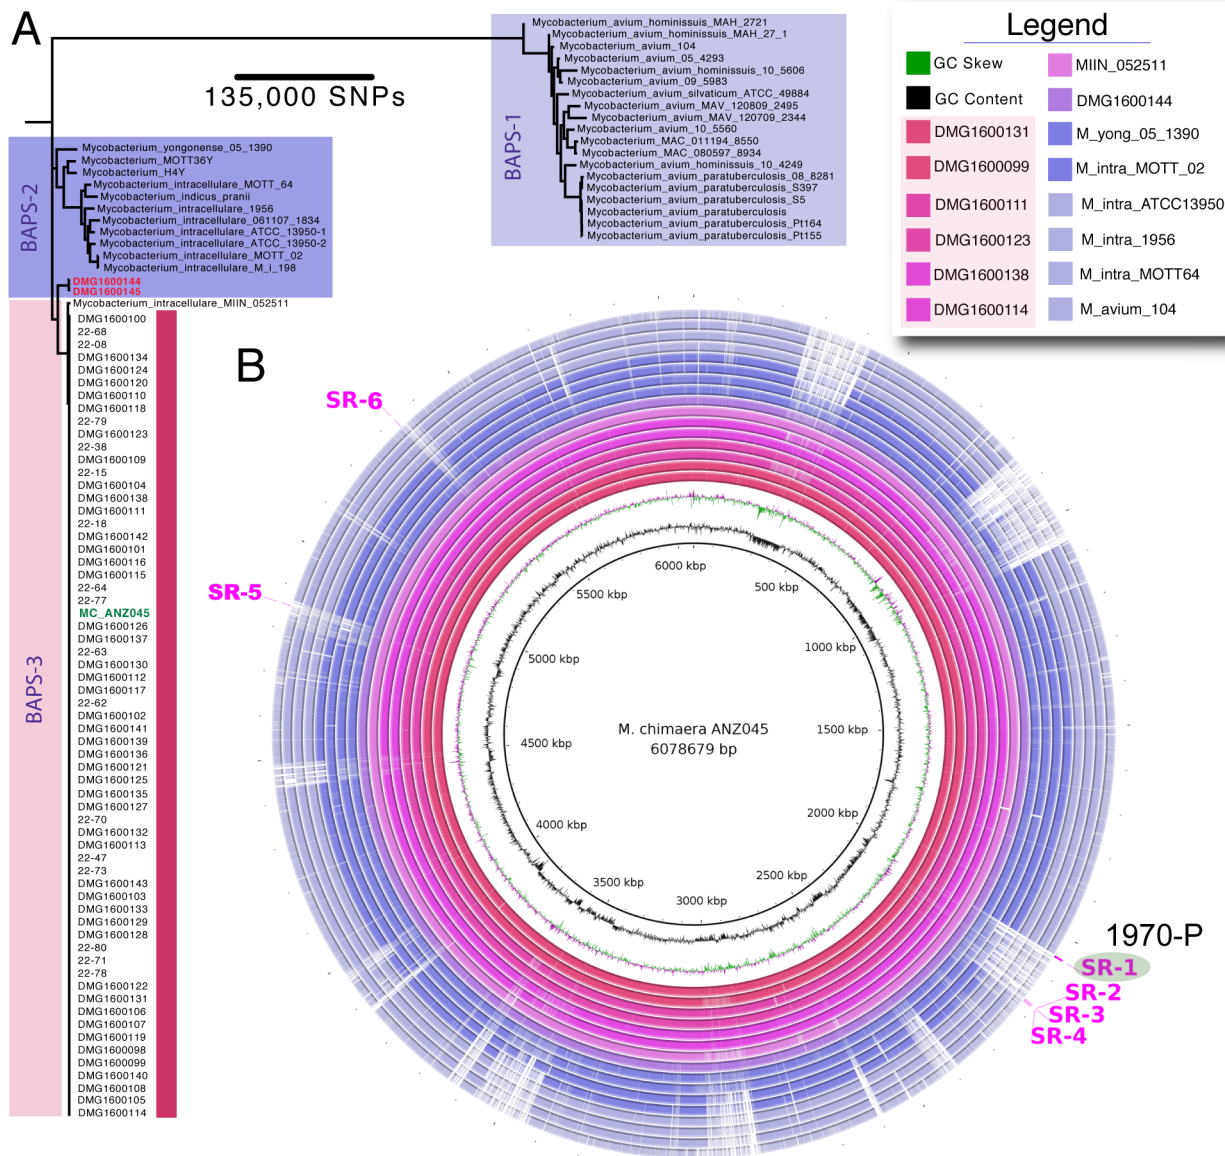

458 **Fig. 1. Phylogenetic and population structure analysis of *M. chimaera*** (A): Core genome maximum  
459 likelihood phylogeny of 63 *M. chimaera* and 33 other, related mycobacteria, based on alignment of  
460 448,878 variable nucleotide positions. The tree was inferred with FastTree using a GTR model of  
461 nucleotide substitution. All major branches had FastTree support values >0.9. Lineages are coloured  
462 and BAPS group designations are indicated. The scale bar indicates the number of SNPs represented by  
463 the horizontal branches. The location of ANZ045 *M. chimaera* reference genome is shown in green  
464 typeface. (B) Visualization using the Blast Ring Image Generator (32) of DNA:DNA whole genome  
465 comparisons among a subset of mycobacterial genomes used to identify *M. chimaera* specific regions.  
466 ANZ045 *M. chimaera* reference chromosome is depicted by the inner black circle. The identity of the  
467 subsequent rings is given in the legend. Annotations on the outer most ring show the location of the  
468 seven *M. chimaera*-specific regions, highlighting the region targeted for TaqMan PCR assay  
469 development.

470

471 **Fig. 2**

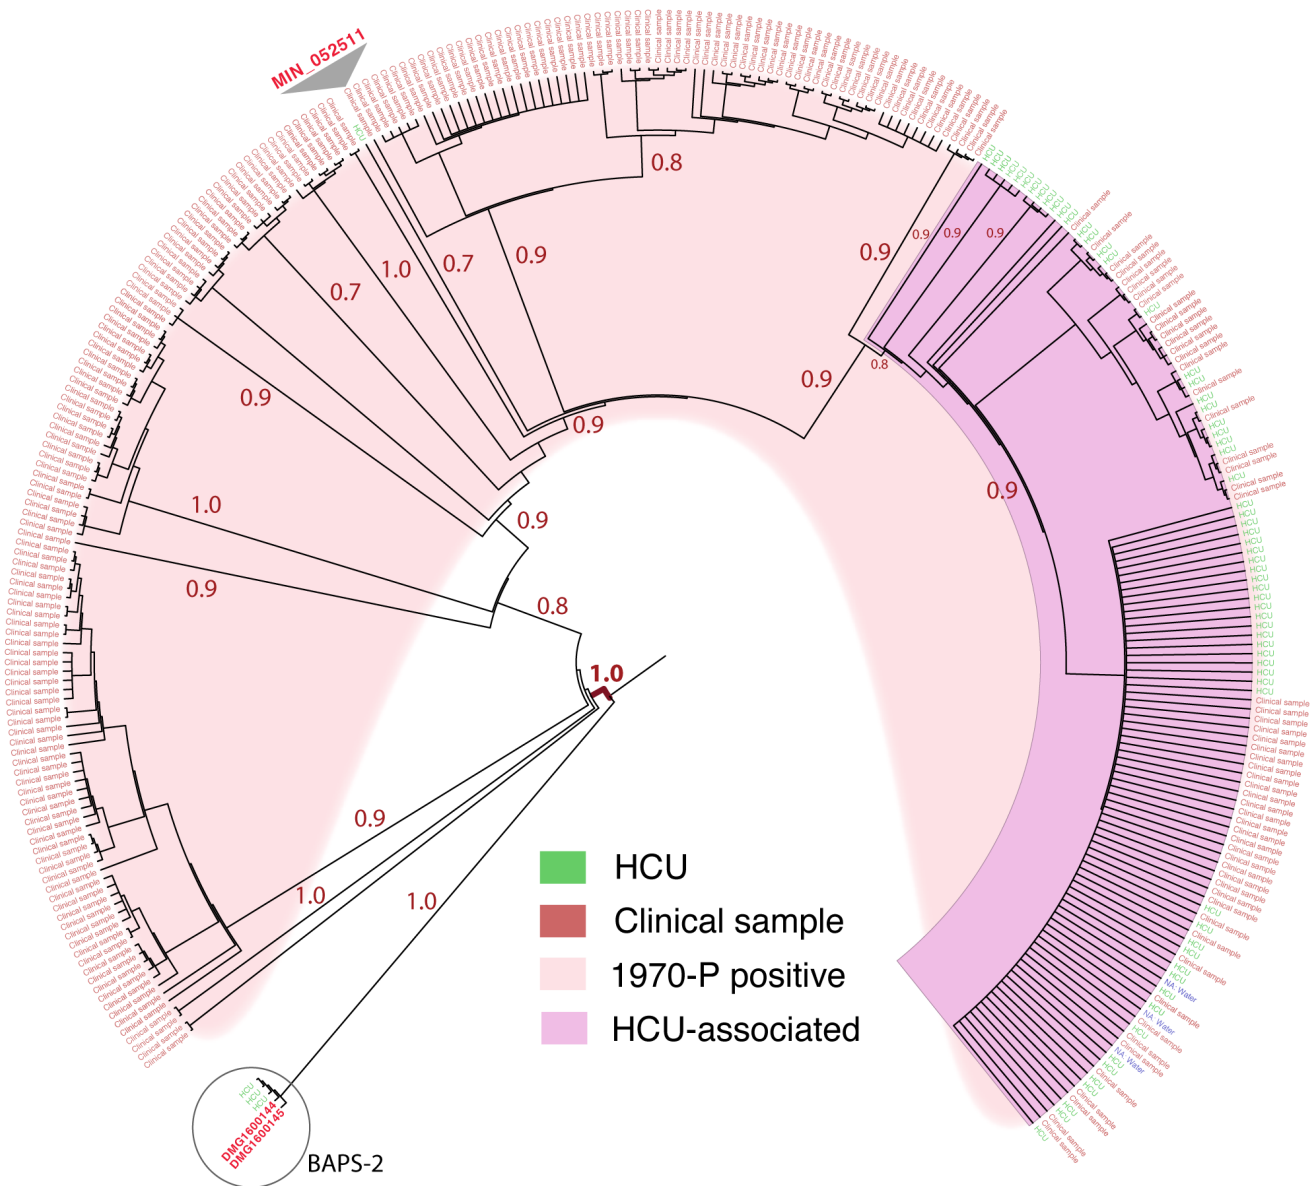

472  
473  
474  
475  
476  
477  
478  
479  
480  
481  
482  
483

**Fig. 2. Focused phylogenetic analysis of 303 *M. chimaera* genomes.** (A): Core genome maximum likelihood phylogeny of 303 *M. chimaera* (BAPS-3) and five other, related mycobacteria (BAPS-2), based on alignment of 10,166 variable nucleotide positions (recombination removed). The tree was inferred with FastTree using a GTR model of nucleotide substitution and rooted using DMG1600144 (BAPS-2, encircled) as an outgroup. The FastTree support values for major branches are indicated. Branch lengths have been transformed and they are proportional but not to scale. The location within the phylogeny of a sequence identified previously as *M. intracellulare* (MIN\_052511) is indicated.

484 **Fig. 3**

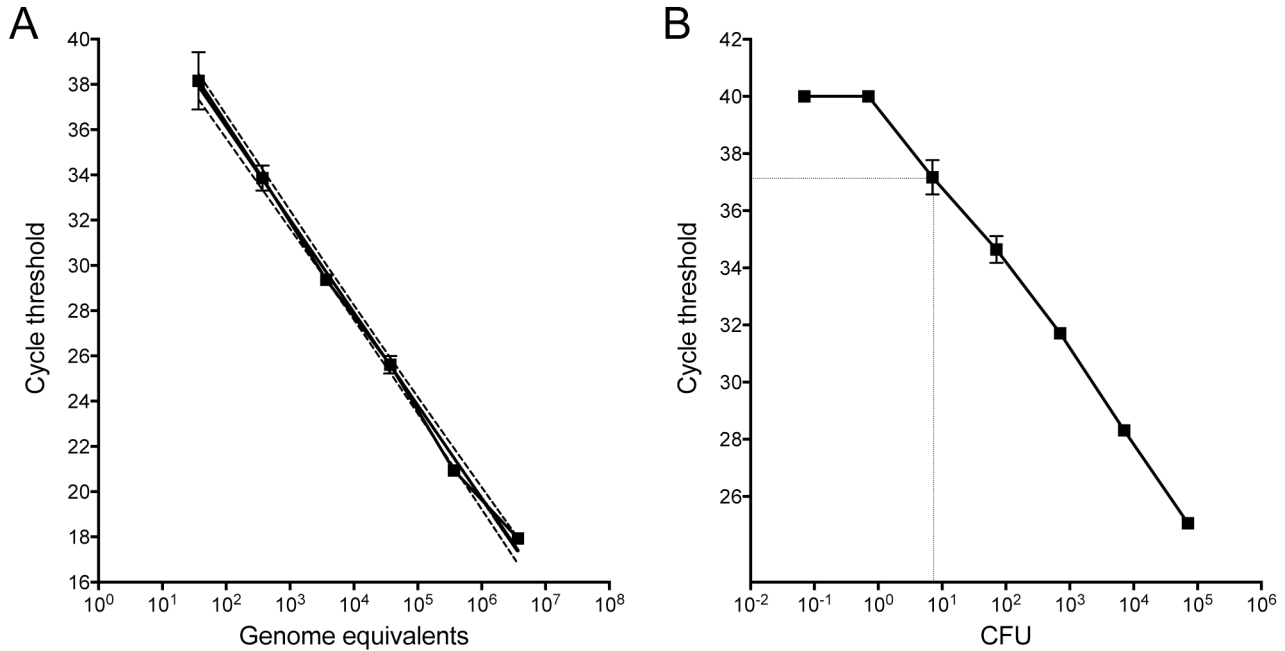

485

486 **Fig. 3. Sensitivity testing of 1970-P TaqMan PCR for *M. chimaera*.** (A) Standard curve showing Ct  
487 versus *M. chimaera* 10-fold serial dilutions, expressed as genome equivalents (log scale). Shown are  
488 the mean and standard deviation for triplicate DNA preparations for assay 1970-P. A curve was  
489 interpolated using linear regression,  $R^2 = 0.992$ . Dotted lines indicate 95% confidence intervals. (B)  
490 Detection sensitivity of 1970-P for detection of *M. chimaera* spiked into whole blood, indicating a limit  
491 of detection of 10 CFU. Shown are the mean and standard deviation for triplicate blood samples and  
492 DNA extractions for each dilution.

493

494 **Tables:**

495

496 **Table 1: Summary of the six putative *M. chimaera*-specific DNA segments identified by comparative genomics**

| <b>Region ID</b> | <b>Position in ANZ045 chromosome</b> | <b>Length (bp)</b> | <b>Putative CDS spanning region</b> | <b>TaqMan probe ID<sup>1</sup></b> |
|------------------|--------------------------------------|--------------------|-------------------------------------|------------------------------------|
| SR1              | 2047981-2052621                      | 4,641              | 2 x hypothetical proteins           | 1970                               |
| SR2              | 2168889-2169420                      | 531                | 1 x hypothetical protein            |                                    |
| SR3              | 2171047-2171975                      | 928                | 1 x hypothetical protein            |                                    |
| SR4              | 2174560-2175316                      | 756                | No protein-coding region detected   |                                    |
| SR5              | 4855157-4855879                      | 722                | 1 x hypothetical protein            |                                    |
| SR6              | 5338898-5339612                      | 714                | tRNA-His(gtg)                       |                                    |

497 Notes: <sup>1</sup>Probe ID number is based on the position of the first nucleotide of the TaqMan probe in the DNA segment (refer Table 2)

498

499

500

501 **Table 2: Sequences of the *M. chimaera*-specific TaqMan primers and probe**

|                       | <b>ID</b> | <b>Sequence (5'-3')</b> | <b><i>M. chimaera</i>-<br/>specific region</b> | <b>Position in ANZ045<br/>chromosome</b> | <b>Amplicon<br/>length (bp)</b> |
|-----------------------|-----------|-------------------------|------------------------------------------------|------------------------------------------|---------------------------------|
| <b>TaqMan Probe</b>   | 1970-P    | ACTCAAACACCTGACGAGTCA   | SR1                                            | 2,049,950-2,049,970                      | 79                              |
| <b>Forward primer</b> | 1939-F    | ACTTGACGAGGTCTTGCAGG    | SR1                                            | 2,049,919-2,049,938                      |                                 |
| <b>Reverse primer</b> | 2017-R    | GACGGCATAGAGATTCGCCA    | SR1                                            | 2,049,978-2,049,997                      |                                 |

502

503

504

505 **Table 3: Environmental sampling qPCR, culture and heterotrophic plate count summary**

| SAMPLE ID | 1970-P (Ct) | Genome equivalents | Volume water filtered (mL) (qPCR) | Genome equivalents/mL water | Culture positive (50 mL) | HCC/mL (log <sub>10</sub> ) | Source                                      |
|-----------|-------------|--------------------|-----------------------------------|-----------------------------|--------------------------|-----------------------------|---------------------------------------------|
| 17444     | No Ct       | ND                 | 500                               | ND                          | no                       | 2.7                         | Facility C: HCU                             |
| 17651     | No Ct       | ND                 | 200                               | ND                          | no                       | 3.2                         | Facility F: HCU                             |
| 17851     | No Ct       | ND                 | 216                               | ND                          | no                       | ND                          | Facility D: HCU cardioplegia tank           |
| 18078     | No Ct       | ND                 | 420                               | ND                          | no                       | ND                          | Facility G: HCU cardioplegia tank           |
| 18298     | No Ct       | ND                 | 480                               | ND                          | no                       | ND                          | Facility G: HCU cardioplegia tank           |
| 18849     | No Ct       | ND                 | 220                               | ND                          | no                       | ND                          | Facility G: HCU cardioplegia tank           |
| 18850     | No Ct       | ND                 | 130                               | ND                          | no                       | ND                          | Facility G: HCU cardioplegia tank           |
| 19130     | No Ct       | ND                 | 420                               | ND                          | no                       | 1                           | Facility D: HCU                             |
| 19330     | 37.76       | 40                 | 1000                              | 2                           | no                       | ND                          | Facility G: HCU cardioplegia tank           |
| 17443     | 37.67       | 42                 | 34                                | 62                          | no                       | 2.8                         | Facility C: HCU                             |
| 14211     | 36.17       | 98                 | 270                               | 18                          | yes                      | ND                          | Facility C: HCU                             |
| 18079     | 36.04       | 105                | 960                               | 5                           | no                       | ND                          | Facility G: HCU cardioplegia tank           |
| 17164     | 35.22       | 167                | 60                                | 139                         | no                       | 3.1                         | Facility E: HCU                             |
| 9221      | 34.32       | 277                | 60                                | 231                         | yes                      | ND*                         | Facility A: HCU overflow water bottle       |
| 18297     | 34.32       | 277                | 1000                              | 14                          | no                       | ND                          | Facility G: HCU cardioplegia tank           |
| 18080     | 33.79       | 372                | 420                               | 44                          | no                       | 1                           | Facility G: HCU cardioplegia tank           |
| 10895     | 32.96       | 593                | 50                                | 593                         | yes                      | ND                          | Facility B: HCU unit-3 Patient circuit      |
| 10896     | 32.65       | 706                | 70                                | 504                         | yes                      | ND                          | Facility B: HCU unit-3 cardioplegia circuit |
| 19128     | 32.53       | 755                | 420                               | 90                          | no                       | ND                          | Facility D: HCU                             |
| 10892     | 32.26       | 879                | 50                                | 879                         | yes                      | ND                          | Facility B: HCU unit-1 cardioplegia circuit |
| 10894     | 31.85       | 1106               | 30                                | 1843                        | yes                      | ND                          | Facility B: HCU unit-2 cardioplegia circuit |
| 18081     | 30.46       | 2412               | 960                               | 126                         | no                       | 1                           | Facility G: HCU cardioplegia tank           |
| 17850     | 30.19       | 2806               | 300                               | 468                         | no                       | 1                           | Facility D: HCU cardioplegia tank           |
| 19129     | 30.13       | 2902               | 400                               | 363                         | no                       | 1                           | Facility D: HCU                             |
| 16569     | 29.19       | 4917               | 200                               | 1229                        | no                       | 4.3                         | Facility D: HCU unit-1                      |
| 18949     | 29.13       | 5086               | 220                               | 1156                        | no                       | ND                          | Facility H: HCU cardioplegia circuit        |



|       |       |        |     |        |                  |     |                                        |
|-------|-------|--------|-----|--------|------------------|-----|----------------------------------------|
| 18948 | 28.69 | 6509   | 275 | 1183   | no               | ND  | Facility H: HCU patient circuit        |
| 18951 | 28.58 | 6923   | 280 | 1236   | no               | ND  | Facility H: HCU cardioplegia circuit   |
| 10897 | 25.98 | 29765  | 70  | 21261  | yes              | 1   | Facility B: HCU unit-1 patient circuit |
| 16571 | 24.82 | 57055  | 200 | 14264  | yes <sup>#</sup> | 1   | Facility D: HCU unit-3                 |
| 10893 | 23.55 | 116325 | 80  | 72703  | yes              | 2.7 | Facility B: HCU unit-2 Patient circuit |
| 18950 | 23.04 | 154851 | 130 | 59558  | no               | ND  | Facility H: HCU patient circuit        |
| 16570 | 21.31 | 408655 | 200 | 102164 | yes              | 1   | Facility D: HCU unit-2                 |

Notes: <sup>#</sup>culture contaminated; \* ND = not detected

506  
507  
508  
509

510 **Table 4: Correspondence between *M. chimaera* culture and 1970-P qPCR in HCU samples**

|               | <b>Culture<br/>positive</b> | <b>Culture<br/>negative</b> | <b>Total</b> |
|---------------|-----------------------------|-----------------------------|--------------|
| <b>qPCR +</b> | 10                          | 15                          | 25           |
| <b>qPCR -</b> | 0                           | 8                           | 8            |
| <b>Total</b>  | 10                          | 23                          | 33           |

511

512
